# Supplementary material for: Effects of mixed simulations-based interprofessional education in nursing students: A quasi-experimental study
Source: Research Square preprint supplement (doi:10.21203/rs.3.rs-4775168/v1), 2024-08-26
Supplement: Supplementary file 1 [file 6d823d59c2261ee29484b070.docx]

**Instructional Test Questionnaire**

Please fill in your name and learning number on the following horizontal line.

Name:

Student ID:

The following are multiple-choice questions, totaling 19 questions, with 5 points for each question.

1. What is the most common symptom of acute peritonitis? ( )
2. Vomit
3. Have a temperature
4. Stomach ache
5. Abdominal bloating
6. Constipate
7. What are the iconic signs of peritonitis? ( )
8. Abdominal breathing weakened
9. Tenderness, rebound tenderness, tension of abdominal muscles
10. The bowel sounds disappeared
11. Positive for mobile dullness
12. Obvious abdominal distention
13. Which of the following position can reduce the absorption of abdomen toxins in patients with peritonitis?( )
14. Horizontal position
15. Lateral position
16. Prone position
17. Semi-reclining position
18. Head low and feet high
19. A 32-year-old man, after having dinner with friends, suddenly had severe pain in his upper abdomen. Physical examination: Abdominal distension and upper abdominal tenderness are obvious, with rebound pain and abdominal muscle tension. Which the following processing is incorrect? ( )
20. Fast
21. Parenteral and parenteral nutrition support
22. Use antibiotics to control infection
23. Intravenous infusion
24. Semi-reclining position
25. Which the following nursing measures about gastrointestinal decompression is incorrect? ( )
26. Explaining the purpose and cooperation methods of gastrointestinal decompression to patients in order to obtain cooperation.
27. Checking whether all parts of gastrointestinal decompression device are installed correctly, unobstructed and air leakage.
28. Fasting and drinking water are needed during gastrointestinal decompression.
29. Gastrointestinal decompression tube should be properly fixed to avoid displacement or prolapse.
30. Strengthen oral care.
31. The earliest symptoms of acute left heart failure are ( )
32. Cough and expectoration
33. Dyspnea
34. Dysphoria
35. Edema of lower extremity
36. Perspire profusely
37. Which of the following is wrong when rescuing patients with acute pulmonary edema? ( )
38. The drooping posture of both lower limbs
39. Intravenous injection of furosemide
40. Intravenous injection of cedilanid
41. Low flow intermittent oxygen inhalation
42. High flow continuous oxygen inhalation
43. Which of the following statements about acute left heart failure is incorrect? ( )
44. The lungs are covered with moist rales or wheezing sounds.
45. Coughi powder white or red foam-like sputum.
46. Hearing the gallop rhythm in the apex of heart.
47. Cardiogenic shock may occur in severe cases.
48. Caused by systemic blood stasis.
49. Which of the following statements about the body position of patients with acute left heart failure is incorrect? ( )
50. Those with obvious dyspnea at rest should be given a semi-recumbent position or an upright position, and their legs droop to reduce the amount of blood returned to the heart and the preload of the heart.
51. If there is respiratory or cardiac arrest, resuscitation position should be given.
52. After the rescue, the patient with stable condition should exercise as soon as possible to prevent deep vein thrombosis.
53. When the condition is stable, it is advisable for the patient to lie in a comfortable position.
54. In order to reduce the heart load, exercise should be done step by step after the condition is stable.
55. A 76-year-old male patient with a history of COPD for 30 years. Three days ago, after catching cold, he coughed again with white mucus and phlegm, with a large amount and shortness of breath. Which of the following drugs should patients avoid at this time? ( )
56. Bromhexine Hydrochloride Tablets
57. Aminophylline
58. Salbutamol
59. Codeine
60. Ambroxol hydrochloride
61. A 74-year-old male with a history of chronic bronchitis for 20 years. Cough, white mucus and phlegm occurred again after catching cold a week ago, accompanied by dyspnea, chest tightness and fatigue. He was admitted to the hospital with "chronic bronchitis complicated with chronic obstructive emphysema". What is the most likely complication of patients?( )
62. Upper gastrointestinal bleeding
63. Cardiac failure
64. DIC
65. Respiratory failure
66. Acute renal failure
67. Which is the most suitable position for chronic patients with obstructive pulmonary disease in acute stage?( )
68. Half-sitting position
69. Prone position
70. Horizontal position
71. Left lateral decubitus position
72. Right lateral decubitus position
73. Which of the following drugs is prohibited in the treatment of patients with hepatic encephalopathy?( )
74. Cimetidine
75. Diazepam
76. Arginine
77. Magnesium sulfate
78. Sodium glutamate
79. What is the purpose of suspending protein diet for patients with hepatic encephalopathy?( )
80. Reduce the formation of ammonia
81. Reduce the absorption of ammonia
82. Promote the conversion of ammonia
83. Reduce blood urea nitrogen
84. Reduce the PH value in the intestine
85. A 55-year-old male patient, suffering from liver disease, has drowsiness. When his temperature was measured this morning, he did not respond to the call, but he had a painful expression when he pressed the supraorbital nerve. It should be judged as ( )
86. mental confusion
87. somnolence
88. deep coma
89. light coma
90. faint
91. A 50-year-old man has a history of peptic ulcer for 10 years. Persistent abdominal pain occurred in the early morning, which could not be relieved after taking omeprazole, and radiated to the back, so he came to the hospital for treatment. What was most likely to happen to this patient?( )
92. Gastrointestinal bleeding
93. Cancerate
94. Hemorrhagic peripheral circulation failure
95. Peptic ulcer perforation
96. Pyloric stenosis
97. 33-year-old man suffered from an open fracture of the lower 1/3 of the left femoral shaft due to a car accident, with the distal end displaced backward, accompanied by injuries of popliteal artery, popliteal vein and common peroneal nerve. What is the most important content in the observation of the condition? ( )
98. Blood pressure, pulse and consciousness
99. Sensory function of left lower limb
100. Motor function of left lower limb
101. Wound infection
102. Left lower limb reflex function
103. A 39-year-old man suffered a fracture of the left femoral shaft caused by a fall while riding a horse, and was treated with tibial tubercle bone traction. Which of the following measures should be taken to prevent excessive traction?( )
104. Raise the end of the bed
105. The left foot reaches the end of the bed
106. Measure the length of legs regularly
107. Relaxation and contraction exercises of quadriceps brachii muscle
108. Release the traction device regularly
109. The patient had active bleeding of gastric ulcer and hemorrhagic shock. The central venous pressure was low and the blood pressure was low. Which of the following was the primary nursing measure for nurses? ( )

A.Immediately transferred to the operating room.

B.Giving antibiotics

C.Indwelling catheter

D.Open two venous access

E.Report doctor

The following are multiple-choice questions, with 1 question in total and 5 points for each question.

1. What are the monitoring contents of acute left heart failure?( )
2. Consciousness and mental state
3. Changes of respiratory frequency and depth
4. Skin color and temperature change
5. Urine volume, heart rate and blood oxygen
6. Nutritional status

Answer:

1.C

2.B

3.D

4.B

5.C

6.B

7.D

8.E

9.C

10.D

11.D

12.A

13.B

14.A

15.D

16.D

17.A

1. C
2. D

20.ABCD
